# Supplementary material
Source: PubMed Central journal article supplement (PMC3703973)
Supplement: 1309171110_pnas.201309171SI.pdf [file 1309171110_pnas.201309171SI.pdf]

# Supporting Information

Wang et al. 10.1073/pnas.1309171110

## SI Materials and Methods

### Cell-Free Assay for Decaprenylphosphoryl Arabinose Biosynthesis.

**Preparation of the mycobacterial membrane and cell envelope enzymatic fraction.** About 2 g cell pellet *Mycobacterium smegmatis* mc<sup>2</sup>155 grown in LB medium (Invitrogen) supplemented with 0.05% Tween 80 was washed with buffer A (50 mM Mops, pH 7.9, 5 mM 2-mercaptoethanol, 10 mM MgCl<sub>2</sub>) and suspended in 10 mL same buffer. The cells were disintegrated by probe sonication performed in 30-s pulses with 90-s cooling pauses (repeated 20 times). The sonicate was centrifuged at 15,600 × *g* for 20 min at 4 °C, and the resulting pellet was used for preparation of the cell envelope enzymatic fraction as described (1) with minor modifications. Briefly, the pellet was homogenized with buffer A to the volume of 4 mL of the final suspension, to which 6 mL Percoll (GE Healthcare) was added; the mixture was centrifuged at 15,600 × *g* for 60 min at 4 °C. The white upper band was collected, and Percoll was removed from the sample by repeated washings with buffer A and centrifugations at 15,600 × *g* for 20 min at 4 °C. The final pellet was resuspended in 400 μL buffer A, resulting in the sample with a protein concentration of 6.8 mg/mL, which was used as the source of the cell envelope enzyme in the cell-free reactions. Membrane fraction with protein concentration of 49 mg/mL was prepared by centrifugation of 15,600 × *g* supernatant of the sonicate at 100,000 × *g* as described (1).

**Composition and analysis of the cell-free reactions.** The reaction mixtures contained 75,000 dpm phospho-[<sup>14</sup>C]-ribose diphosphate (2), 0.1 mM NADH, 3.125% DMSO, 500 μg membrane protein, or 200 μg cell envelope protein and buffer A in the final volume of 80 μL. TCA1 and benzothiazinone 043 (BTZ043) dissolved in DMSO were added to the reaction mixtures in the final concentration of 25 μg/mL. For dose-dependence experiments, TCA1 was added in the final concentrations 1, 3, 6, 12, and 25 μg/mL in the reaction mixtures. After 1 h incubation at 37 °C, the reactions were stopped by the addition of 1.5 mL CHCl<sub>3</sub>/CH<sub>3</sub>OH (2:1). After 20 min of extraction of the reaction products at room temperature, 170 μL buffer A were added, and the tubes were thoroughly mixed and then briefly centrifuged at 3,000 × *g* to achieve separation of two phases of the mixture (3). The upper aqueous phase containing unreacted radiolabeled substrate was discarded; the bottom organic phase was transferred to the new tube and dried under the stream of N<sub>2</sub> at room temperature. The organic extract was dissolved in 40 μL CHCl<sub>3</sub>/CH<sub>3</sub>OH/H<sub>2</sub>O/conc. NH<sub>4</sub>OH (65:25:3.6:0.5) and analyzed by TLC on aluminum-backed silica gel plates (F<sub>254</sub>; Merck) in CHCl<sub>3</sub>/CH<sub>3</sub>OH/1M CH<sub>3</sub>COONH<sub>4</sub>/conc. NH<sub>4</sub>OH/H<sub>2</sub>O (180:140:9:9:23). Radiolabeled compounds were visualized by autoradiography (BioMax MR film; Kodak).

1. Mikusová K, et al. (2005) Decaprenylphosphoryl arabinofuranose, the donor of the D-arabinofuranosyl residues of mycobacterial arabinan, is formed via a two-step epimerization of decaprenylphosphoryl ribose. *J Bacteriol* 187(23): 8020–8025.

2. Scherman MS, et al. (1996) Polyprenylphosphate-pentoses in mycobacteria are synthesized from 5-phosphoribose pyrophosphate. *J Biol Chem* 271(47):29652–29658.

3. Folch J, Lees M, Sloane Stanley GH (1957) A simple method for the isolation and purification of total lipides from animal tissues. *J Biol Chem* 226(1):497–509.

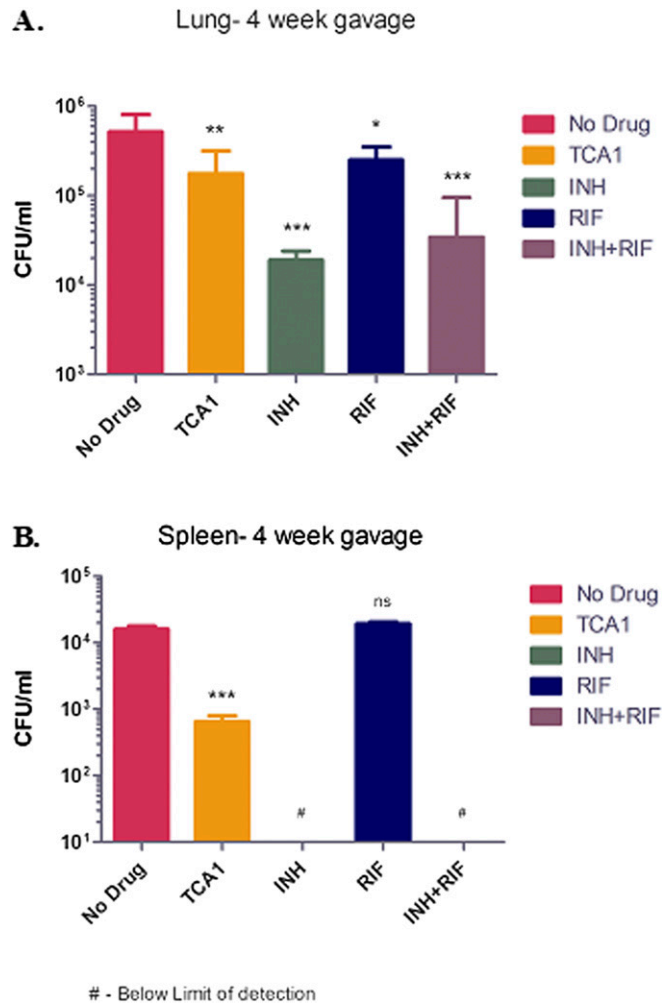

**Fig. S1.** In an acute tuberculosis infection mouse model (2 wk infection) followed by 4 wk of gavage (1 time/d and 5 d/wk), TCA1 showed bactericidal activity in both (A) lungs and (B) spleen. The doses of TCA1, isoniazid (INH), and rifampicin (RIF) are 40, 25, and 10 mg/kg, respectively. RIF and INH were administered in drinking water. *P* value less than 0.001.



**Table S1. Genotype of extensively drug-resistant tuberculosis strain**

| Strain no.           | Strain name | Genotype                                                                                                                                                                                             | Drug resistance                                     |
|----------------------|-------------|------------------------------------------------------------------------------------------------------------------------------------------------------------------------------------------------------|-----------------------------------------------------|
| mc <sup>2</sup> 8013 | TF275       | <i>inhA</i> [t1673432a] <i>katG</i> [S315T] <i>rpoB</i> [D435G] <i>embB</i> [M306V]<br><i>ethA</i> [t4327484c] <i>gidB</i> [ΔL50-P93] <i>pncA</i> [+gA152]<br><i>gyrA</i> [A90V] <i>rrs</i> [a1400g] | INH RIF EMB<br>ETH SM pyrazinamide<br>OXF KM CAP AM |

**Table S2. CYP activity and human cell cytotoxicity of TCA1**

|                         | IC <sub>50</sub> (μM) |
|-------------------------|-----------------------|
| CYP inhibition          |                       |
| CYP3A4                  | >10                   |
| Human cell cytotoxicity |                       |
| Huh7                    | >25                   |
| 293T                    | >25                   |
| K562                    | >25                   |
| HepG2                   | >25                   |
| Vero                    | >100                  |
| hERG assay              | >30                   |

**Table S3. Mean pharmacokinetic parameters of three mice after i.v. and p.o. administration**

|                                            | TCA1            |                 |                 |
|--------------------------------------------|-----------------|-----------------|-----------------|
|                                            | i.v. (10 mg/kg) | p.o. (20 mg/kg) | p.o. (50 mg/kg) |
| Area under the curve (h × nM)              | 13,268          | 4,724           | 12,851          |
| Low clearance (mL/min per kilogram)        | 36.41           | N/A             | N/A             |
| Steady-state volume of distribution (L/kg) | 1.06            | N/A             | N/A             |
| C <sub>max</sub> (nM)                      | 20,195          | 2,122           | 5,653           |
| T <sub>max</sub> (h)                       | 0.03            | 0.5             | 0.5             |
| T <sub>1/2</sub> (h)                       | 0.73            | 1.8             | 1.83            |
| MRT (h)                                    | 0.5             | N/A             | N/A             |
| F (%)                                      | N/A             | 46              | 19              |

p.o., per oral.

**Table S4. Histopathology findings**

| Diagnosis/severity                                 | No drug |   |   |   |   | TCA1 |   |   |   |   |
|----------------------------------------------------|---------|---|---|---|---|------|---|---|---|---|
|                                                    | 1       | 2 | 3 | 4 | 5 | 1    | 2 | 3 | 4 | 5 |
| Lungs (n = 5)                                      |         |   |   |   |   |      |   |   |   |   |
| <i>Pneumonia, granulomatous</i>                    | 0       | 1 | 1 | 2 | 1 | 0    | 0 | 0 | 0 | 0 |
| <i>Neutrophils within granulomatous foci</i>       | 0       | 0 | 1 | 1 | 1 | 0    | 0 | 0 | 0 | 0 |
| <i>Infiltrate, perivascular, lymphohistiocytic</i> | 0       | 2 | 2 | 2 | 2 | 1    | 0 | 0 | 0 | 0 |
| <i>Acid fast bacteria in inflammatory foci</i>     | 0       | 1 | 2 | 2 | 2 | 0    | 0 | 0 | 0 | 0 |
| Spleen (n = 5)                                     |         |   |   |   |   |      |   |   |   |   |
| <i>Histiocytic aggregates (granuloma)</i>          | 3       | 3 | 2 | 2 | 2 | 0    | 0 | 0 | 0 | 0 |
| <i>Acid Fast organisms</i>                         | 3       | 2 | 1 | 2 | 1 | 0    | 0 | 0 | 0 | 0 |

Each slide had five tissue sections. Grading scale: 0, no finding; 1, minimal finding (for pneumonia = 0–10% lung involvement); 2, mild finding (for pneumonia = 11–30% lung involvement); 3, moderate finding. Note that a mild grading in the spleen is not the same as in the lung, because the lung generally has more acid-fast bacilli (AFB) than the spleen. A mild designation for AFB in the spleen is equivalent to a minimal designation in the lung.

**Table S5. X-ray diffraction data and structure refinement**

|                                          |                         |
|------------------------------------------|-------------------------|
| X-ray diffraction data                   |                         |
| Protein:ligand                           | DprE1:TCA1              |
| Beamline                                 | Diamond I02             |
| Wavelength (nm)                          | 0.9795                  |
| Space group                              | $P2_1$                  |
| Cell parameters a, b, c (Å), $\beta$ (°) | 78.2, 84.2, 81.1, 103.6 |
| Molecules per asymmetric unit            | 2                       |
| Resolution (Å)                           | 84.2–2.61               |
| High-resolution shell (Å)                | 2.68–2.61               |
| Rmerge (%) <sup>*</sup>                  | 10.2 (99.2)             |
| Observations: total/unique               | 148,069/31,083          |
| $I/\sigma(I)$                            | 13.1 (2.3)              |
| Completeness (%) <sup>*</sup>            | 99.7 (99.0)             |
| Multiplicity <sup>*</sup>                | 4.8 (4.9)               |
| $CC_{1/2}$ <sup>†</sup>                  | 0.997 (0.717)           |
| Refinement                               |                         |
| Resolution range                         | 62.5–2.6                |
| Unique reflections                       | 31,059                  |
| $R_{free}$ (%) / $R_{cryst}$ (%)         | 24.8/18.9               |
| No. of nonhydrogen atoms                 | 6,566                   |
| Protein + FAD, ligand, solvent           | 6,454, 50, 62           |
| rmsd bonds (Å), angles (°)               | 0.008, 1.17             |
| B factors                                |                         |
| Wilson (Å <sup>2</sup> )                 | 62.9                    |
| Average (Å <sup>2</sup> )                | 55.5                    |
| Protein + FAD (Å <sup>2</sup> )          | 55.2                    |
| Ligand (Å <sup>2</sup> )                 | 88.8                    |
| Solvent (Å <sup>2</sup> )                | 57.5                    |
| rmsd B factors (Å <sup>2</sup> )         | 7.3                     |
| Ramachandran plot <sup>‡</sup>           |                         |
| Favored region                           | 97.6                    |
| Allowed regions                          | 2.4                     |
| Disallowed (no.)                         | 0                       |

$CC_{1/2}$ , percentage of correlation between intensities from random half-datasets as defined in (1).

<sup>\*</sup>Values for high-resolution shell are in parentheses.

<sup>†</sup>Pearson correlation coefficient between reflection half-sets as defined in Karplus and Diederichs (1).

<sup>‡</sup>Ramachandran plot statistics calculated using MolProbity (2).

1. Karplus PA, Diederichs K (2012) Linking crystallographic model and data quality. *Science* 336(6084):1030–1033.

2. Chen VB, et al. (2010) MolProbity: All-atom structure validation for macromolecular crystallography. *Acta Crystallogr D Biol Crystallogr* 66(Pt 1):12–21.
